# Supplementary material for: Communication- and position-aware reconfigurable route optimization in large-scale mobile sensor networks
Source: Springer Nature journal article supplement (doi:10.1186/1687-1499-2014-207), 2014-12-01
Supplement: 13638_2014_1077_MOESM2_ESM.pdf [file 13638_2014_1077_MOESM2_ESM.pdf]

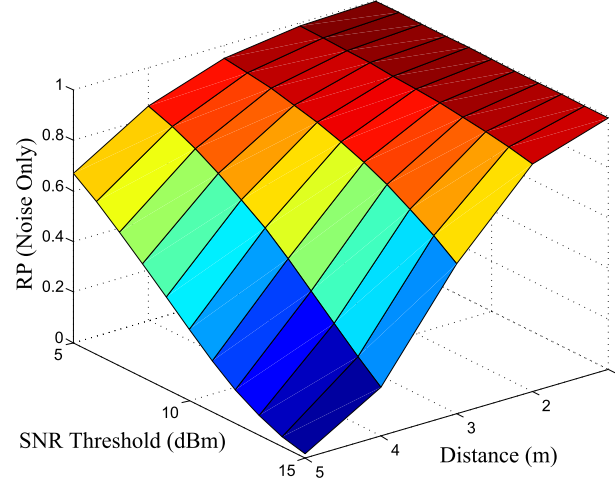

(a) Distance (1-5m), SNR threshold (5-15 dBm)

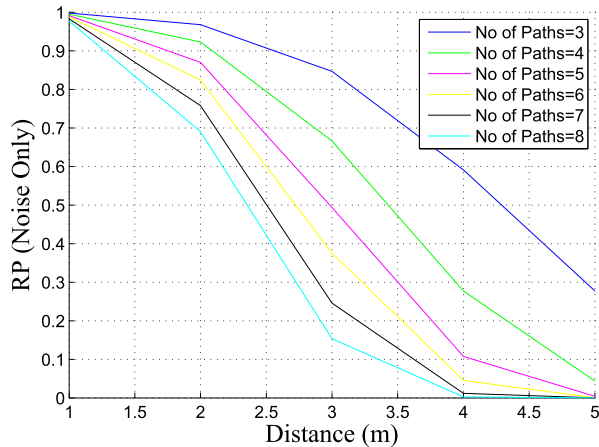

(b) Number of paths (3-8)
